# Supplementary material
Source: PubMed Central journal article supplement (PMC3137667)
Supplement: NIHMS275195-supplement-Supp_Table_S1.pdf [file NIHMS275195-supplement-Supp_Table_S1.pdf]

### Supplementary Table 1.

**Epitopic and structural preference of antibody binding to individual carbohydrate structures** carried out by unsupervised agglomerative hierarchical clustering using Ward's method (53) with 1-correlation distance on the medTSI including both the 203 glycans and the 8 biotin controls. Cluster identification number (ID).

| ID | Carbohydrate structures                          | Correlation<br>(min- max) |
|----|--------------------------------------------------|---------------------------|
| 1  | Fuca1-4(Fuca1-2Galβ1-3)GlcNAcβ1-3Galβ1-4Glcβ-sp4 | 0.78 - 0.98               |
|    | Fuca1-2Galβ1-3GlcNAcβ1-3Galβ1-4Glcβ-sp4          |                           |
|    | Fuca1-2Galβ1-3GlcNAcβ1-3Galβ1-4Glcβ-sp4          |                           |
|    | Fuca1-3(Fuca1-2Galβ1-4)GlcNAcβ1-3Galβ1-4Glcβ-sp4 |                           |
|    | Galβ1-3GlcNAcβ1-3Galβ1-4Glcβ-sp4                 |                           |
|    | Galβ1-4GlcNAcβ1-3Galβ1-4Glcβ-sp4                 |                           |
| 2  | technical control (8x)                           | 0.82 - 0.97               |
| 3  | Manα-sp                                          | 0.67-0.95                 |
|    | aminoglucitol                                    |                           |
|    | GlcN(Gc)β-sp4                                    |                           |
|    | GlcNAcβ1-3Galβ-sp2                               |                           |
| 4  | Manα1-3(Manα1-6)Manβ-sp4                         | 0.23 - 0.80               |
|    | Manα1-3(Manα1-6)Manα1-6(Manα1-3)Manβ-sp4         |                           |
|    | Fuca1-3(Fuca1-2Galβ1-4)GlcNAcβ-sp                |                           |
|    | (G-GN-M)2-3,6-M-GN-GNβ-sp4                       |                           |

|   |                                                                                                                                                                                                                                                                                                                                                                                             |             |
|---|---------------------------------------------------------------------------------------------------------------------------------------------------------------------------------------------------------------------------------------------------------------------------------------------------------------------------------------------------------------------------------------------|-------------|
|   | (GN-M)2-3,6-M-GN-GN $\beta$ -sp4                                                                                                                                                                                                                                                                                                                                                            |             |
|   | Man $\alpha$ 1-3(Man $\alpha$ 1-6)Man $\beta$ 1-4GlcNAc $\beta$ 1-4GlcNAc $\beta$ -<br>sp4Gal $\beta$ 1-4GlcNAc $\beta$ 1-3(Gal $\beta$ 1-4GlcNAc $\beta$ 1-6)Gal $\beta$ 1-<br>4GlcNAc-sp2                                                                                                                                                                                                 |             |
| 5 | Fuc $\alpha$ 1-2Gal $\beta$ 1-4GlcNAc $\beta$ -sp<br>Fuc $\alpha$ 1-3(NeuAc $\alpha$ 2-3Gal $\beta$ 1-4)6-O-Su-GlcNAc $\beta$ -sp                                                                                                                                                                                                                                                           | 0.36        |
| 6 | Gal $\beta$ 1-2Gal $\beta$ -sp<br>Neu5Gc $\alpha$ 2-6Gal $\beta$ 1-4GlcNAc $\beta$ -sp<br>NeuAc $\alpha$ 2-6Gal $\beta$ 1-4GlcNAc $\beta$ -sp                                                                                                                                                                                                                                               | 0.44 - 0.89 |
| 7 | Neu5Ac $\alpha$ 2-6(Gal $\beta$ 1-3)GlcNAc $\beta$ 1-3Gal $\beta$ 1-4Glc $\beta$ -sp4<br>(Glc $\alpha$ 1-4)3 $\beta$ -sp4<br>(Glc $\alpha$ 1-4)4 $\beta$ -sp                                                                                                                                                                                                                                | 0.56 - 0.67 |
| 8 | Neu5Ac $\alpha$ 2-8Neu5Ac $\alpha$ 2-sp<br>GlcNAc $\beta$ 1-4(GlcNAc $\beta$ 1-6)GalNAc $\alpha$ -sp<br>Man $\alpha$ 1-6Man $\beta$ -sp4<br>Neu5Ac $\alpha$ 2-8Neu5Ac $\alpha$ -OCH <sub>2</sub> C <sub>6</sub> H <sub>4</sub> -p-sp4<br>GlcNAc $\beta$ 1-3(GlcNAc $\beta$ 1-6)Gal $\beta$ 1-4GlcNAc $\beta$ -sp2                                                                           | 0.21 - 0.59 |
| 9 | Gal $\beta$ 1-4GlcNAc $\beta$ -sp<br>Gal $\beta$ 1-4(6-O-Su)GlcNAc $\beta$ -sp<br>Gal $\beta$ 1-4GlcNAc $\beta$ 1-3Gal $\beta$ 1-4GlcNAc $\beta$ -sp<br>Gal $\beta$ 1-4GlcNAc $\beta$ 1-3Gal $\beta$ 1-4GlcNAc $\beta$ 1-3Gal $\beta$ 1-<br>4GlcNAc $\beta$ -sp2<br>GlcNAc $\beta$ 1-3Gal $\beta$ 1-4GlcNAc $\beta$ -sp<br>3-O-Su-Gal $\beta$ 1-4GlcNAc $\beta$ 1-3Gal $\beta$ 1-4GlcNAc-sp | 0.48 - 0.96 |

|    |                                                                                           |             |
|----|-------------------------------------------------------------------------------------------|-------------|
|    | GlcNAc $\beta$ 1-3Gal $\beta$ 1-4GlcNAc $\beta$ -sp2                                      |             |
|    | Gal $\beta$ 1-4GlcNAc $\beta$ 1-3Gal $\beta$ 1-4GlcNAc $\beta$ -sp2                       |             |
|    | GlcNAc $\beta$ 1-4GlcNAc $\beta$ 1-4GlcNAc $\beta$ -sp4                                   |             |
| 10 | (GlcNAc $\beta$ 1-4)5 $\beta$ -sp4                                                        | 0.91 - 0.96 |
|    | (GlcNAc $\beta$ 1-4)6 $\beta$ -sp4                                                        |             |
|    | GlcNAc $\beta$ 1-4GlcNAc $\beta$ -sp4                                                     |             |
| 11 | GlcNAc $\beta$ 1-4GlcNAc $\beta$ -Asn                                                     | 0.78        |
|    | Fuc $\alpha$ 1-2Gal $\beta$ 1-3GalNAc $\alpha$ -sp                                        |             |
|    | Fuc $\alpha$ 1-4(Fuc $\alpha$ 1-2Gal $\beta$ 1-3)GlcNAc $\beta$ -sp                       |             |
| 12 | GlcA $\beta$ -sp                                                                          | 0.40 - 0.71 |
|    | Fuc $\alpha$ -sp                                                                          |             |
|    | GlcNAc $\beta$ 1-3(Gal $\beta$ 1-4GlcNAc $\beta$ 1-6)Gal $\beta$ 1-4GlcNAc $\beta$ -sp2   |             |
|    | 6-H <sub>2</sub> PO <sub>3</sub> Glc $\beta$ -sp4                                         |             |
|    | GalNAc $\beta$ 1-4Gal $\beta$ 1-4Glc $\beta$ -sp                                          |             |
| 13 | Gal $\alpha$ 1-3Gal $\beta$ 1-4(Fuc $\alpha$ 1-3)GlcNAc $\beta$ -sp                       | 0.26 - 0.55 |
|    | Fuc $\alpha$ 1-3(NeuAc $\alpha$ 2-3Gal $\beta$ 1-4)GlcNAc $\beta$ -sp                     |             |
|    | 3-O-Su-Gal $\beta$ -sp                                                                    |             |
| 14 | 3',4'-O-Su <sub>2</sub> -Gal $\beta$ 1-4GlcNAc $\beta$ -spGal $\alpha$ 1-3Gal $\beta$ -sp | 0.24 - 0.49 |
|    | Fuc $\alpha$ 1-4(Gal $\beta$ 1-3)GlcNAc $\beta$ -sp                                       |             |
|    | 3'-O-Su-Gal $\beta$ 1-4Glc $\beta$ -sp <sub>2</sub>                                       |             |
| 15 | 3'-O-Su-Gal $\beta$ 1-4GlcNAc $\beta$ -sp                                                 | 0.69 - 0.84 |
|    | 3'-O-Su-Gal $\beta$ 1-4GlcNAc $\beta$ -sp <sub>2</sub>                                    |             |

|    |                                                |             |
|----|------------------------------------------------|-------------|
|    | 3',6-O-Su2-Galβ1-4GlcNAcβ-sp                   |             |
|    | 3',6-O-Su2-Galβ1-4Glcβ-sp2                     |             |
| 16 | GlcNAcβ1-3Galβ1-4Glcβ-sp2                      | 0.15 - 0.62 |
|    | Galβ1-4Glcβ-sp                                 |             |
|    | 6-O-Su-Galβ1-4Glcβ-sp2                         |             |
|    | 6'-O-Su-Galβ1-4GlcNAcβ-sp                      |             |
| 17 | 6'-O-Su-Galβ1-4GlcNAcβ-sp2                     | 0.43 - 0.81 |
|    | 3',6,6'-O-Su3-Galβ1-4GlcNAcβ-sp2               |             |
|    | 3',6'-O-Su2-Galβ1-4GlcNAcβ-sp2                 |             |
|    | Fucα1-3(Neu5Acα2-3Galβ1-4)GlcNAcβ1-3Galβ-sp    |             |
| 18 | Fucα1-3(3-O-Su-Galβ1-4)GlcNAcβ-sp              | 0.43 - 0.70 |
|    | GlcNAcβ1-6(Galβ1-4GlcNAcβ1-3)Galβ1-4GlcNAc-sp2 |             |
|    | Neu5Acα2-3GalNAcα-sp                           |             |
| 19 | NeuAcα2-3Galβ1-3-(6-Su)GalNAcα-sp              | 0.20 - 0.43 |
|    | GlcAα-sp                                       |             |
|    | Fucα1-2Galβ1-4Glcβ-sp4                         |             |
|    | GlcNAcβ-O-C6H4-NH2                             |             |
| 20 | Neu5Acα2-3Galβ-sp                              | 0.19 - 0.68 |
|    | 6-H2PO3Manα-sp                                 |             |
|    | Galβ1-3GalNAcα-p-OC6H4NH2                      |             |
|    | (SA2-6G-GN-M)2-3,6-M-GN-GNβ-sp4                |             |
| 21 | GalNAcβ1-3Galβ-sp                              | 0.29 - 0.98 |
|    | Fucα1-2(GalNAcβ1-3)Galβ-sp                     |             |
|    | Fucα1-2(GalNAcβ1-3)Galβ-sp                     |             |

|    |                                                                                                      |             |
|----|------------------------------------------------------------------------------------------------------|-------------|
|    | Neu5Ac $\alpha$ 2-8Neu5Ac $\beta$ -OCH <sub>2</sub> C <sub>6</sub> H <sub>4</sub> -p-sp <sub>4</sub> |             |
| 22 | (NeuAc $\alpha$ 2-8) <sub>3</sub> -sp-beta                                                           | 0.37 - 0.73 |
|    | Neu5Ac $\beta$ -OCH <sub>2</sub> C <sub>6</sub> H <sub>4</sub> -p-sp <sub>4</sub>                    |             |
|    | Fuc $\alpha$ 1-2(Gal $\beta$ 1-4GalNAc $\beta$ 1-3)Gal $\beta$ 1-4GlcNAc $\beta$ -sp                 |             |
|    | 3'-O-Su-Gal $\beta$ 1-3GalNAc $\alpha$ -sp                                                           |             |
| 23 | NeuAc $\alpha$ 2-3Gal $\beta$ 1-3GalNAc $\alpha$ -sp                                                 | 0.36 - 0.71 |
|    | Man $\beta$ -sp                                                                                      |             |
|    | NeuAc $\alpha$ 2-3Gal $\beta$ 1-4Glc $\beta$ -sp                                                     |             |
|    | GlcNAc $\alpha$ 1-3Gal $\beta$ 1-4GlcNAc $\beta$ -sp                                                 |             |
| 24 | GlcNAc $\alpha$ 1-3Gal $\beta$ 1-4GlcNAc $\beta$ -sp <sub>2</sub>                                    | 0.43 - 0.95 |
|    | Gal $\beta$ 1-3Gal $\beta$ 1-4GlcNAc $\beta$ -sp <sub>4</sub>                                        |             |
|    | Gal $\beta$ 1-3GalNAc $\beta$ 1-4Gal $\beta$ 1-4Glc $\beta$ -sp                                      |             |
|    | GlcNAc $\beta$ 1-2Gal $\beta$ 1-3GalNAc $\alpha$ -sp                                                 |             |
|    | NeuAc $\alpha$ 2-6Gal $\beta$ 1-4Glc $\beta$ -sp <sub>4</sub>                                        |             |
|    | Fuc $\alpha$ 1-4GlcNAc $\beta$ -sp                                                                   |             |
| 25 | NeuAc $\alpha$ 2-3Gal $\beta$ 1-4Glc $\beta$ -sp <sub>4</sub>                                        | 0.34 - 0.76 |
|    | NeuAc $\alpha$ 2-8NeuAc $\alpha$ 2-3Gal $\beta$ 1-4Glc $\beta$ -sp <sub>4</sub>                      |             |
|    | Gal $\alpha$ 1-2Gal $\beta$ -sp                                                                      |             |
|    | Fuc $\alpha$ 1-2(Gal $\beta$ 1-4GalNAc $\alpha$ 1-3)Gal $\beta$ 1-4GlcNAc $\beta$ -sp                |             |
|    | 4',6'-O-Su <sub>2</sub> -Gal $\beta$ 1-4GlcNAc $\beta$ -sp <sub>2</sub>                              |             |
| 26 | 4',6'-O-Su <sub>2</sub> -Gal $\beta$ 1-4GlcNAc $\beta$ -sp                                           | 0.78 - 0.98 |
|    | 4'-O-Su-Gal $\beta$ 1-4GlcNAc $\beta$ -sp                                                            |             |
|    | 4'-O-Su-Gal $\beta$ 1-4GlcNAc $\beta$ -sp <sub>2</sub>                                               |             |

|    |                                                                                   |             |
|----|-----------------------------------------------------------------------------------|-------------|
|    | GalNAc $\alpha$ 1-3GalNAc $\beta$ -sp                                             |             |
|    | GalNAc $\alpha$ 1-3Gal $\beta$ -sp                                                |             |
| 27 | Gal $\alpha$ 1-3GalNAc $\beta$ -sp                                                | 0.14 - 0.70 |
|    | Man $\beta$ 1-4GlcNAc $\beta$ -sp4                                                |             |
|    | Gal $\alpha$ 1-6Glc $\beta$ -sp                                                   |             |
|    | Gal $\alpha$ 1-4Gal $\beta$ 1-4Glc $\beta$ -sp4                                   |             |
| 28 | Glc $\alpha$ 1-6Glc $\alpha$ 1-6Glc $\beta$ -sp4                                  | 0.94        |
|    | isomaltotetraose-sp                                                               |             |
|    | Gal $\alpha$ 1-3GalNAc $\alpha$ -p-OC <sub>6</sub> H <sub>4</sub> NH <sub>2</sub> |             |
| 29 | Glc $\alpha$ 1-4Glc $\beta$ -sp                                                   | 0.15 - 0.42 |
|    | Gal $\alpha$ 1-3GalNAc $\alpha$ -sp                                               |             |
|    | Gal $\alpha$ 1-3(Fuc $\alpha$ 1-2)Gal $\beta$ 1-4GlcNAc $\beta$ -sp               |             |
| 30 | Fuc $\alpha$ 1-2(Gal $\alpha$ 1-3)Gal $\beta$ -sp                                 | 0.87 - 0.97 |
|    | Fuc $\alpha$ 1-2(Gal $\alpha$ 1-3)Gal $\beta$ -spy                                |             |
|    | GalNAc $\alpha$ 1-3(Fuc $\alpha$ 1-2)Gal $\beta$ 1-4GlcNAc $\beta$ -sp            |             |
| 31 | Fuc $\alpha$ 1-2(GalNAc $\alpha$ 1-3)Gal $\beta$ -sp                              | 0.59 - 0.92 |
|    | Fuc $\alpha$ 1-2(GalNAc $\alpha$ 1-3)Gal $\beta$ -spy                             |             |
| 32 | Neu5Gc $\beta$ 2-6Gal $\beta$ 1-4GlcNAc $\beta$ -sp                               | 0.87        |
|    | Neu5Ac $\beta$ 2-6Gal $\beta$ 1-4GlcNAc $\beta$ -sp                               |             |
|    | Gal $\beta$ 1-3(Neu5Ac $\alpha$ 2-6)GalNAc $\alpha$ -sp                           |             |
| 33 | Gal $\beta$ 1-3GalNAc $\alpha$ -sp                                                | 0.66 - 0.86 |
|    | GlcNAc $\beta$ 1-6(Gal $\beta$ 1-3)GalNAc $\alpha$ -sp                            |             |
|    | Gal $\beta$ 1-3(Gal $\beta$ 1-4GlcNAc $\beta$ 1-6)GalNAc $\alpha$ -sp             |             |

|    |                                                |             |
|----|------------------------------------------------|-------------|
|    | Fuca1-4(NeuAca2-3Galβ1-3)GlcNAcβ-sp            |             |
|    | Fucβ1-3GlcNAcβ-sp                              |             |
|    | Galβ1-3GlcNAcβ-sp                              |             |
| 34 | 3'-O-Su-Galβ1-3GlcNAcβ-sp                      | 0.44 - 0.90 |
|    | NeuAca2-3Galβ1-3GlcNAcβ-sp                     |             |
|    | Fuca1-3GlcNAcβ-sp                              |             |
|    | GlcNAcβ-sp                                     |             |
|    | GlcAβ1-3GlcNAcβ-sp                             |             |
| 35 | Neu5Acβ2-6GalNAca-sp                           | 0.67        |
|    | Galβ1-3(Neu5Acβ2-6)GalNAca-sp                  |             |
| 36 | Galα1-4Galβ1-4GlcNAcβ-sp                       | 0.64        |
|    | Galα1-4(Fuca1-2)Galβ1-4GlcNAcβ-sp              |             |
| 37 | Galβ1-4GlcNAcβ1-3GalNAca-sp                    | 0.82        |
|    | Galβ1-4GlcNAcβ1-3(Galβ1-4GlcNAcβ1-6)GalNAca-sp |             |
| 38 | 6,6'-O-Su2-Galβ1-4GlcNAcβ-sp2                  |             |
|    | NeuAca2-6Galβ1-4-(6-Su)GlcNAcβ-sp              | 0.25 - 0.63 |
|    | Galα1-3Galβ1-4GlcNAcβ-sp                       |             |
|    | Galα1-3(Galα1-4)Galβ1-4GlcNAcβ-sp              |             |
| 39 | Galβ1-3Galβ-sp                                 | 0.71        |
|    | Galβ1-3Galβ-sp                                 |             |
| 40 | Fuca1-2Galβ1-3GlcNAcβ-sp                       |             |
|    | Fuca1-4(3-O-Su-Galβ1-3)GlcNAcβ-sp              | 0.46 - 0.64 |
|    | (NeuAca2-3Galβ1)2-3,4-GlcNAc-sp                |             |

|    |                                                                           |             |
|----|---------------------------------------------------------------------------|-------------|
|    | NeuAca2-3Galβ1-3(NeuAca2-6)GalNAca-sp                                     |             |
| 41 | Glcα-sp                                                                   | 0.08 - 0.42 |
|    | Fuca1-3(Galβ1-4)GlcNAcβ-sp                                                |             |
| 42 | NeuAca2-3Galβ1-4GlcNAcβ-sp                                                | 0.70        |
|    | NeuAca2-3Galβ1-4-(6-Su)GlcNAcβ-sp                                         |             |
|    | GlcNAcβ1-4Mur-L-Ala-D-i-Gln-Lys                                           |             |
|    | Fuca1-3(NeuAca2-3(6-O-Su)Galβ1-4)GlcNAcβ-sp                               |             |
| 43 | GlcNAcβ1-4-[HOOC(CH <sub>3</sub> )CH]-3-O-GlcNAcβ-sp <sup>4</sup>         | 0.13 - 0.54 |
|    | (NeuAca2-8) <sub>3</sub> α-sp                                             |             |
|    | Fuca1-4(NeuAca2-3Galβ1-3)GlcNAcβ-sp <sup>4</sup>                          |             |
| 44 | GalNAca1-4(Fuca1-2)Galβ1-4GlcNAcβ-sp                                      | 0.96        |
|    | (GlcNAcβ1) <sub>3-3,4,6</sub> -GalNAca-sp                                 |             |
|    | 9-NAc-Neu5Aca-sp                                                          |             |
|    | (9-NAc-NeuAca2-6)Galβ1-4GlcNAcβ-sp                                        |             |
| 45 | GalNAca-sp                                                                | 0.32 - 0.93 |
|    | Neu5Aca2-6GalNAca-sp                                                      |             |
|    | Neu5Gca2-6GalNAca-sp                                                      |             |
|    | Neu5Aca-sp                                                                |             |
|    | GlcNAcβ1-3(GlcNAcβ1-4)Galβ1-4GlcNAcβ-sp                                   |             |
| 46 | Neu5Aca-OCH <sub>2</sub> C <sub>6</sub> H <sub>4</sub> -p-sp <sup>4</sup> | 0.26 - 0.83 |
|    | Galα1-4GlcNAcβ-sp                                                         |             |
|    | Galα1-4GlcNAcβ1-3Galβ1-4GlcNAcβ-sp                                        |             |
| 47 | GlcNAcβ1-6Galβ1-4GlcNAcβ-sp <sup>2</sup>                                  | 0.69        |
|    | Galβ1-4GlcNAcβ1-6Galβ1-4GlcNAcβ-sp <sup>2</sup>                           |             |



|    |                                                                                  |             |
|----|----------------------------------------------------------------------------------|-------------|
|    | Gal $\beta$ 1-3GalNAc $\beta$ -sp                                                |             |
| 48 | Neu5Gc $\alpha$ -sp                                                              | 0.41 - 0.62 |
|    | GlcNAc $\beta$ 1-3Gal $\beta$ 1-3GalNAc $\alpha$ -sp                             |             |
|    | 6-O-Su-GlcNAc $\beta$ -sp                                                        |             |
| 49 | GlcNAc $\beta$ 1-3GalNAc $\alpha$ -sp                                            | 0.34 - 0.77 |
|    | GlcNAc $\beta$ 1-3(GlcNAc $\beta$ 1-6)GalNAc $\alpha$ -sp                        |             |
|    | 6,6'-O-Su <sub>2</sub> -Gal $\beta$ 1-4Glc $\beta$ -sp <sub>2</sub>              |             |
|    | 6'-O-Su-Gal $\beta$ 1-4Glc $\beta$ -sp <sub>2</sub>                              |             |
| 50 | Glc $\beta$ -sp                                                                  | 0.32 - 0.67 |
|    | GlcNAc $\beta$ 1-6GalNAc $\alpha$ -sp                                            |             |
|    | Gal $\beta$ 1-4GlcNAc $\beta$ 1-6GalNAc $\alpha$ -sp                             |             |
|    | Gal $\beta$ -sp                                                                  |             |
|    | GalNAc $\beta$ -sp                                                               |             |
|    | Fuc $\alpha$ 1-2Gal $\beta$ -sp                                                  |             |
| 51 | Neu5Ac $\alpha$ 2-6Gal $\beta$ -sp                                               | 0.29 - 0.63 |
|    | GlcA $\beta$ 1-6Gal $\beta$ -sp                                                  |             |
|    | GlcA $\beta$ 1-3Gal $\beta$ -sp                                                  |             |
|    | Gal $\alpha$ -sp                                                                 |             |
|    | GalNAc $\alpha$ 1-Oser                                                           |             |
|    | Gal $\beta$ 1-4GlcNAc $\alpha$ 1-6Gal $\beta$ 1-4GlcNAc $\beta$ -sp <sub>2</sub> |             |
| 52 | GlcNAc $\beta$ 1-3Man $\beta$ -sp <sub>4</sub>                                   | 0.37 - 0.50 |
|    | GalNAc $\beta$ 1-4GlcNAc $\beta$ -sp                                             |             |
|    | Glc $\beta$ 1-4Glc $\beta$ -sp <sub>4</sub>                                      |             |

---

|    |                                                       |             |
|----|-------------------------------------------------------|-------------|
|    | Rha $\alpha$ -sp                                      |             |
| 53 | Glc $\beta$ 1-6Glc $\beta$ -sp4                       | 0.40 - 0.61 |
|    | GlcNAc $\beta$ 1-4Gal $\beta$ 1-4GlcNAc $\beta$ -sp2  |             |
|    | GlcNAc $\alpha$ 1-6Gal $\beta$ 1-4GlcNAc $\beta$ -sp2 |             |

---

legend:

sp  $-(\text{CH}_2)_3\text{-NH}_2$

sp2  $-(\text{CH}_2)_2\text{-NH}_2$

sp4  $-\text{NH-CO-CH}_2\text{-NH}_2$

spX  $-\text{CH}_2\text{-(CHOH)}_3\text{-CHNHAc-CHOH-CH}_2\text{-CH(NH}_2\text{)-}$

COOH

spY  $\text{O-(CH}_2\text{)}_3\text{-NH-CO(CH}_2\text{)}_5\text{-NH}_2$

Oser O-Serin
