# Supplementary material
Source: PubMed Central journal article supplement (PMC3137667)
Supplement: NIHMS275195-supplement-Supp_Table_S2.pdf [file NIHMS275195-supplement-Supp_Table_S2.pdf]

## Supplementary Table 2.

**Selected clusters with structural similarities.** Cluster identifiers, number of glycans within each cluster, core structure of cluster, glycan length (number of monosaccharides in cluster) are listed for structurally similar glycan clusters. Glycan architecture occurs as a linear tree (-), branched tree (+) or linear/branched together (\*). Localization of core carbohydrate substructures describes where the common sub-structure occurs; at core (directly after the spacer), at terminal part, or varying location. Pearson correlation coefficients for glycans are summarized by within-cluster range of values. Expected natural glycan linkage is described as Glycosphingolipid (GSL); *N*-linked (N); *O*-linked glycan (O).

| Cluster ID | Number of glycans | Key Carbohydrate Substructure                               | Range of glycan length | architecture | Localization of key carbohydrate substructure | Range of pairwise correlation | Expected natural linkage |
|------------|-------------------|-------------------------------------------------------------|------------------------|--------------|-----------------------------------------------|-------------------------------|--------------------------|
| 1          | 6                 | Gal $\beta$ 1-3GlcNAc $\beta$ 1-3Gal $\beta$ 1-4Glc $\beta$ | 4-6                    | *            | core                                          | 0.78-0.98                     | GSL                      |
| 9          | 8                 | [Gal $\beta$ 1-4GlcNAc $\beta$ ] <sub>n</sub>               | 2-6                    | -            | varying                                       | 0.48-0.96                     | N                        |
| 10         | 3                 | [GlcNAc $\beta$ 1-4] <sub>n</sub>                           | 3-6                    | -            | varying                                       | 0.91-0.96                     | N                        |
| 15         | 3                 | 3'-O-Su-Gal $\beta$ 1-4                                     | 2                      | -            | terminal                                      | 0.69-0.84                     | GSL, N                   |
| 16         | 5                 | Gal $\beta$ 1-4Glc or GlcNAc $\beta$                        | 2                      | -            | core                                          | 0.15- 0.62                    | GSL, N                   |
| 17         | 4                 | 6'-O-Su-Gal $\beta$ 1-4GlcNAc                               | 2                      | -            | varying                                       | 0.43-0.81                     | N                        |

|    |   |                                                                        |     |   |         |           |        |
|----|---|------------------------------------------------------------------------|-----|---|---------|-----------|--------|
| 26 | 4 | 4'-O-Su-Galβ1-4GlcNAc                                                  | 2   | - | varying | 0.78-0.98 | N      |
| 28 | 2 | [Glcα-] <sub>n</sub>                                                   | 3,4 | - | varying | 0.94      | GSL    |
| 30 | 3 | Galα1-3(Fuca1-2)Galβ                                                   | 3-4 | - | varying | 0.87-0.97 | GSL, N |
| 31 | 3 | GalNAcα1-3(Fuca1-2)Galβ                                                | 3-4 | - | varying | 0.59-0.92 | GSL, N |
| 32 | 2 | Neu5Gcβ or Neu5Acβ<br>2-6 Galβ1-4GlcNAcβ                               | 3   | - | core    | 0.87      | N      |
| 33 | 4 | Galβ1-3GalNAcα-                                                        | 2-4 | * | varying | 0.66-0.86 | O      |
| 34 | 8 | Fuca1-3, Fucβ1-3 or Galβ1-4GlcNAcβ                                     | 1-4 | * | core    | 0.44-0.90 | N      |
| 35 | 2 | Neu5Acβ2-6GalNAcα                                                      | 2,4 | - | varying | 0.67      | O      |
| 36 | 2 | Galα1-4Galβ1-4GlcNAcβ                                                  | 3,4 | * | varying | 0.64      | N      |
| 37 | 2 | Galβ1-4GlcNAcβ1-3GalNAcα                                               | 3,5 | * | varying | 0.82      | O      |
| 38 | 4 | (6,6'Su <sub>2</sub> ; Neu5Acα2-6; Galα1-3; Galα1-4) to Galβ1-4GlcNAcβ | 2-4 | * | varying | 0.25-0.63 | N      |
| 40 | 3 | Fuca/Neu5Acα1/2-2/3/4-Galβ1-3GlcNAcβ                                   | 3   | * | core    | 0.46-0.64 | N      |
| 42 | 2 | Neu5Acα2-3Galβ1-4GlcNAcβ                                               | 3   | - | varying | 0.70      | N      |
| 44 | 2 | GalNAcα                                                                | 4   | + | varying | 0.96      | N, O   |
| 47 | 2 | GlcNAcβ1-6Galβ1-3GlcNAcβ                                               | 3,4 | - | varying | 0.69      | N      |
