# Supplementary material
Source: PubMed Central journal article supplement (PMC3137667)
Supplement: NIHMS275195-supplement-Supp_Table_S3.pdf [file NIHMS275195-supplement-Supp_Table_S3.pdf]

### Supplementary Table 3

**Multivariate selected discriminating glycan structures.** Glycans ranked by their stability after 700 independent runs

| Rank | Carbohydrate Structure                                          |
|------|-----------------------------------------------------------------|
| 1.   | Gal $\alpha$ 1-4Gal $\beta$ 1-4GlcNAc $\beta$                   |
| 2.   | Neu5Ac $\alpha$ 2-3Gal $\beta$ 1-4-(6-Su)GlcNAc $\beta$         |
| 3.   | Neu5Ac $\beta$ 2-6GalNAc $\alpha$                               |
| 4.   | Neu5Ac $\beta$ 2-6Gal $\beta$ 1-4GlcNAc $\beta$                 |
| 5.   | Neu5Ac $\alpha$ 2-3Gal $\beta$ 1-3-(6-Su)GalNAc $\alpha$        |
| 6.   | Gal $\beta$ 1-4GlcNAc $\beta$ 1-6Gal $\beta$ 1-4GlcNAc $\beta$  |
| 7.   | Gal $\beta$ 1-4(6-O-Su)GlcNAc $\beta$                           |
| 8.   | Gal $\alpha$ 1-3Gal $\beta$ 1-4(Fuc $\alpha$ 1-3)GlcNAc $\beta$ |
| 9.   | Gal $\alpha$ 1-3(Gal $\alpha$ 1-4)Gal $\beta$ 1-4GlcNAc $\beta$ |
| 10.  | GlcNAc $\beta$ 1-3Gal $\beta$ 1-4GlcNAc $\beta$                 |
